# Supplementary material for: A biased allosteric modulator functions as a molecular glue to induce β2AR dimerization
Source: Research Square preprint supplement (doi:10.21203/rs.3.rs-8001844/v1), 2025-11-26
Supplement: Supplementary file 1 [file f529e2aea9e251cdbd90a4cf.docx]

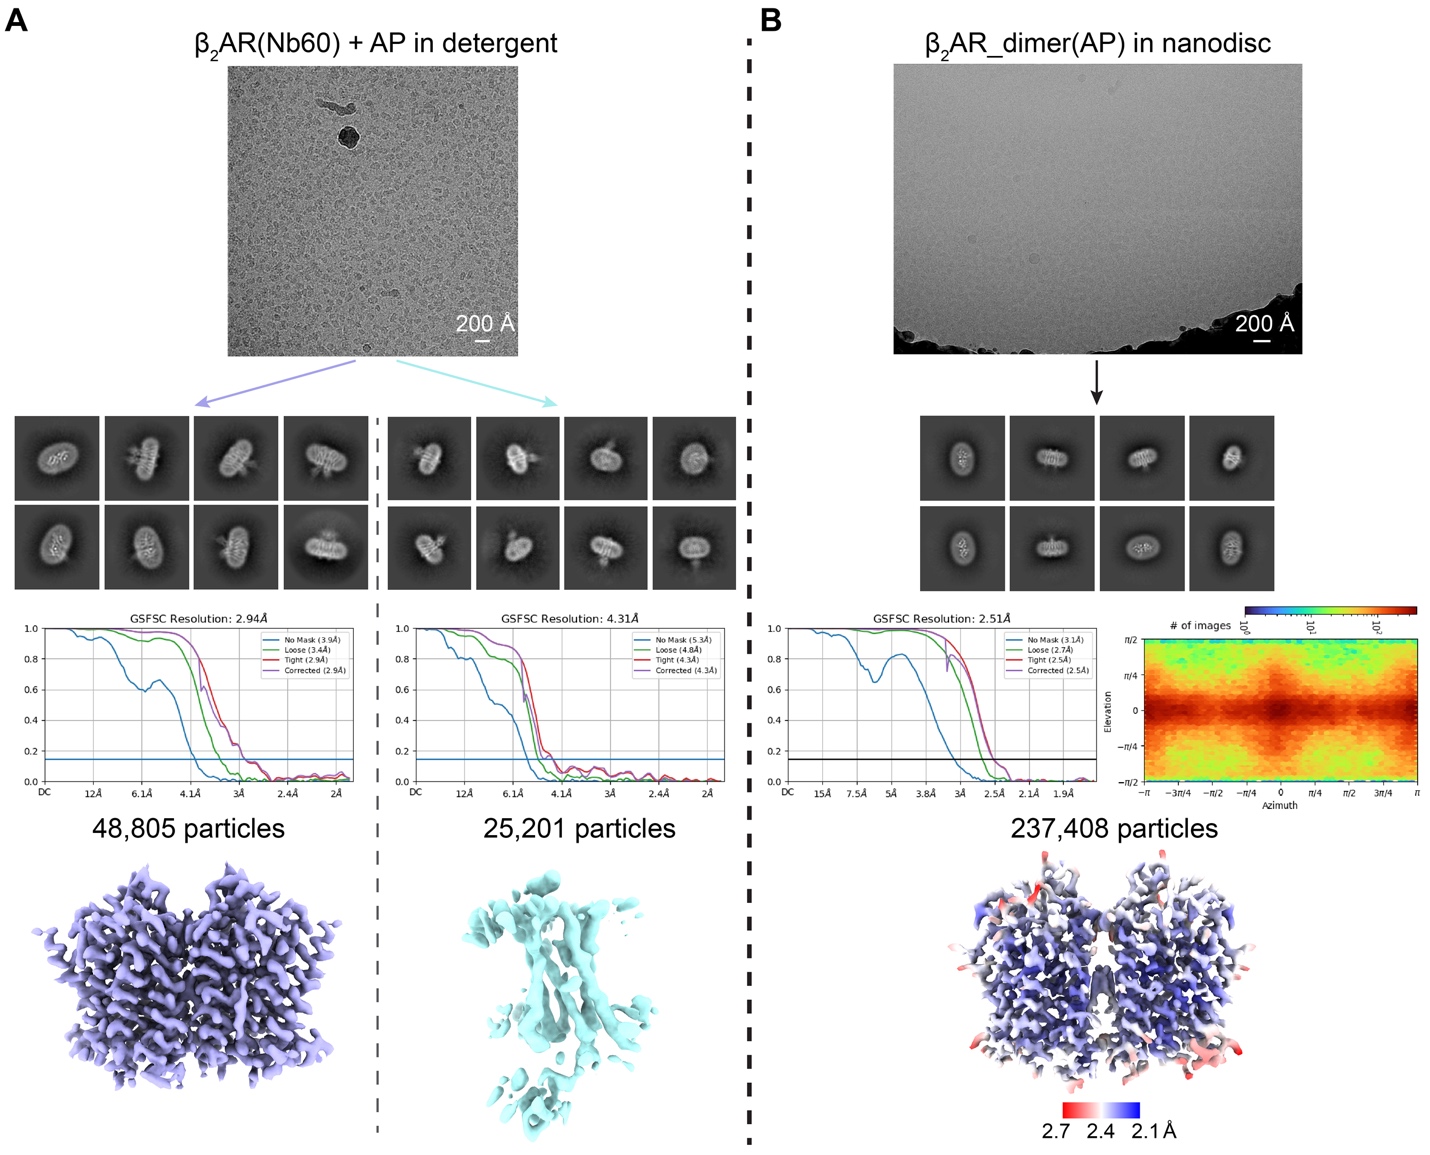


**Supplementary Fig. 1: Cryo-EM structural determination of AP-bound β2AR.** Representative micrographs, 2D class averages, gold-standard Fourier shell correlation (GSFSC) curves, and final maps of **A**, β2AR bound to Nb60 in detergent with AP added post-purification and **B**, AP-bound β2AR dimer in nanodiscs. Dimeric and monomeric particles were processed separately after 2D classification to reconstruct final maps of the dimer (lavender) and monomer (cyan) in **A**. The direction distribution of particles and local resolution heat map for the final reconstruction of β2AR(AP)_dimer in nanodiscs are shown in **B**.


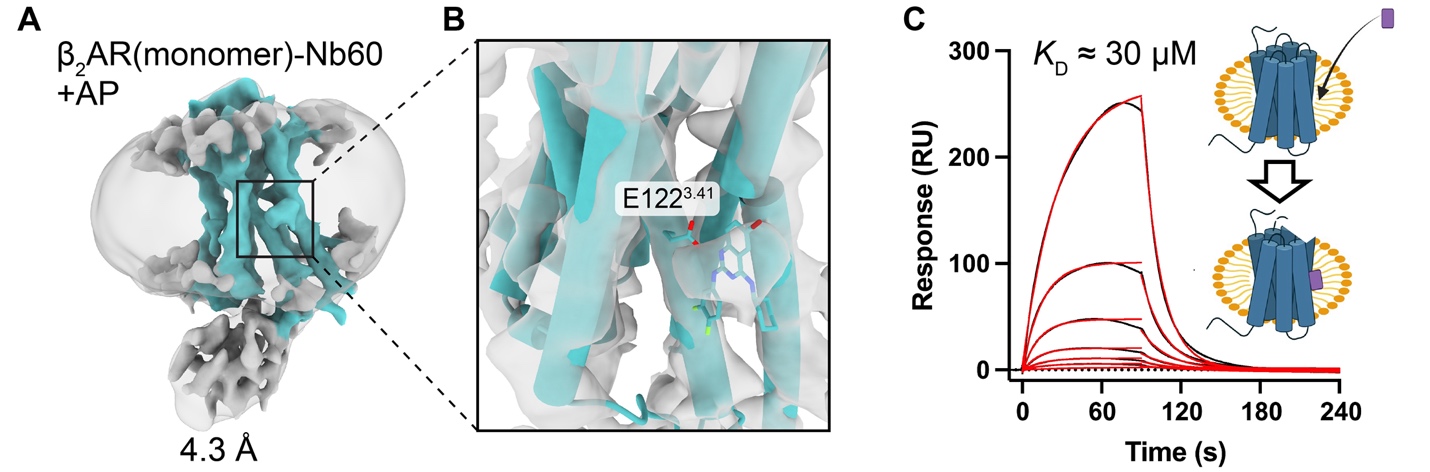


**Supplementary Fig. 2:** **Cryo-EM structure and binding analysis of AP to monomeric β2AR.** **A**, Cryo-EM map of Nb60-bound monomeric β2AR in the presence of AP. **B**, Evidence of AP binding to the monomer at a similar site as in the dimer. One protomer of the dimer (cyan) is fitted into the map. **C**, SPR sensorgrams (black) with corresponding kinetic fits (red) showing AP binding to surface-immobilized monomeric β2AR in detergent. *k*on = 1.92 ×103 M-1 s-1, *k*off  = 6.02 ×10-2 s-1.


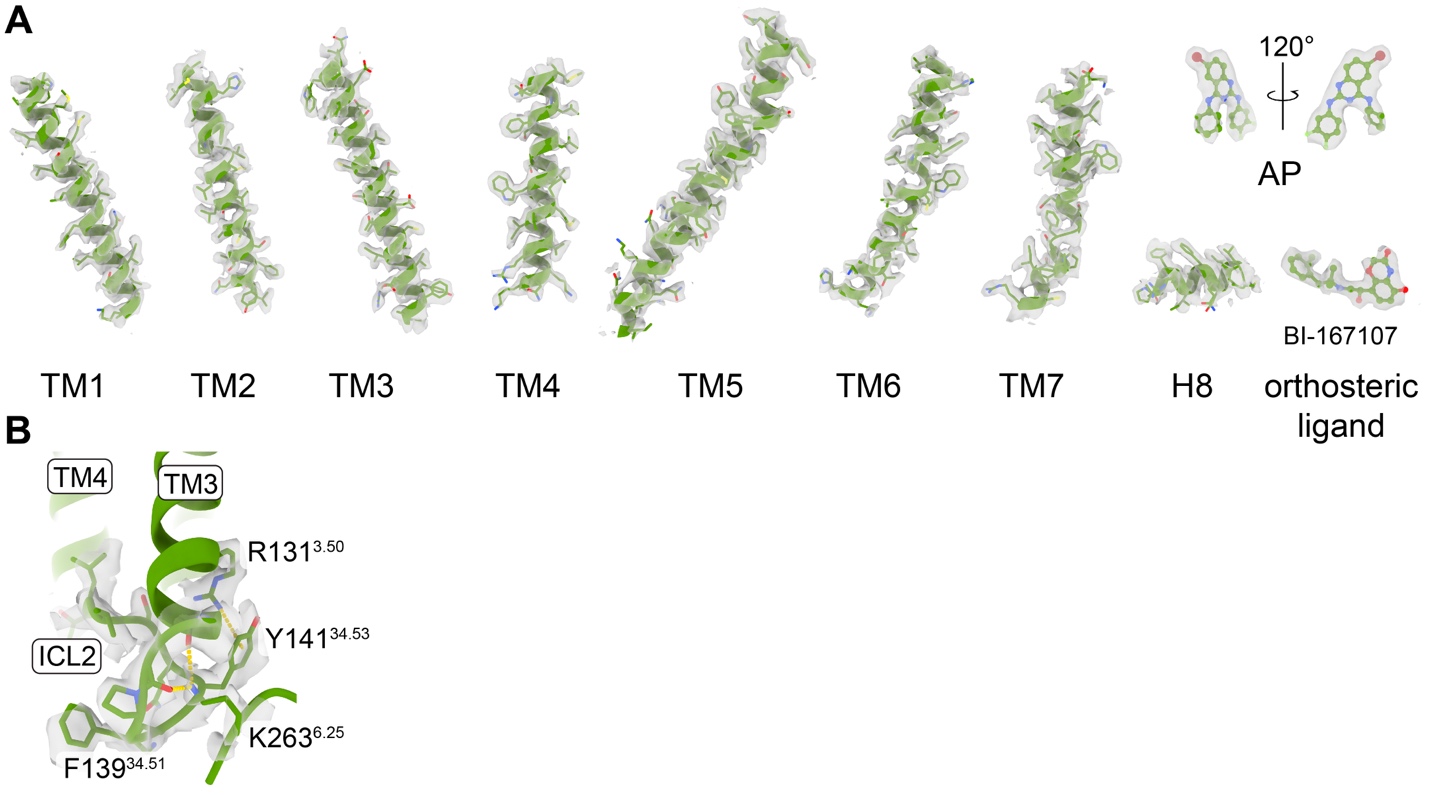


**Supplementary Fig. 3:** **Model-to-map fit of the AP-bound β2AR dimer structure in nanodiscs.** **A**, Side chains of TM1–TM7, H8, AP, and the orthosteric ligand BI from one protomer are shown as sticks with corresponding cryo-EM densities overlaid. **B**, Conformational rearrangement near ICL2 with EM densities overlaid.


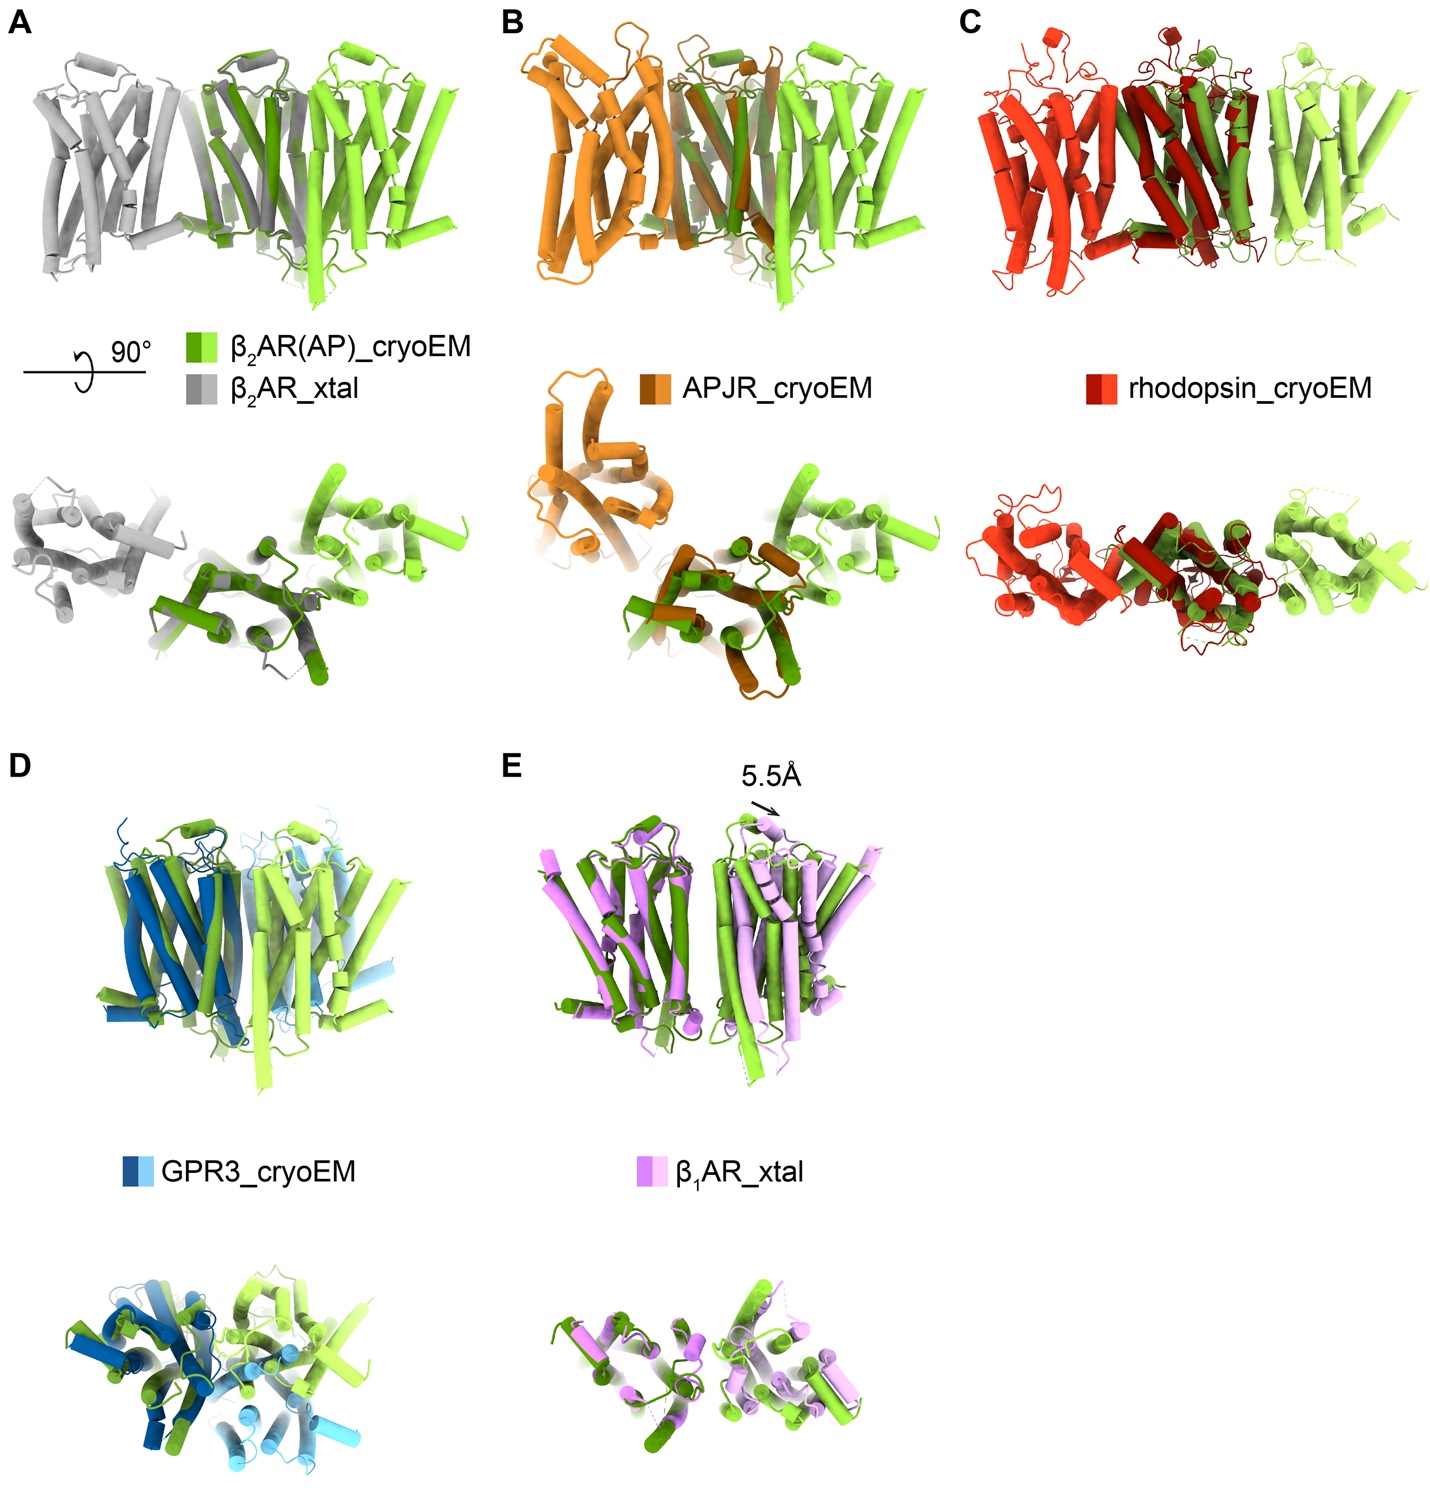


**Supplementary Fig. 4:** **Distinct structural arrangement of AP-bound β2AR dimer compared to other class A GPCR dimers.** Structural comparisons with **A**, the potential dimer observed in the LCP crystal structure of β2AR (PDB ID: 2RH1); **B**, the cryo-EM structure of the human apelin receptor (APJR) dimer (PDB ID: 7W0L); **C**, the cryo-EM structure of bovine rhodopsin dimer (PDB ID: 6OFJ); **D**, the cryo-EM structure of human GPR3 (PDB ID: 9LYD); **E**, the potential dimer interface of the turkey β1AR LCP crystal structure (PDB ID: 4GPO). One protomer from each dimer is aligned for structural comparison. The AP-bound dimer shares similarity with the potential β1AR dimer; however, the two protomers in the β1AR dimer are positioned ~5.5 Å further apart.


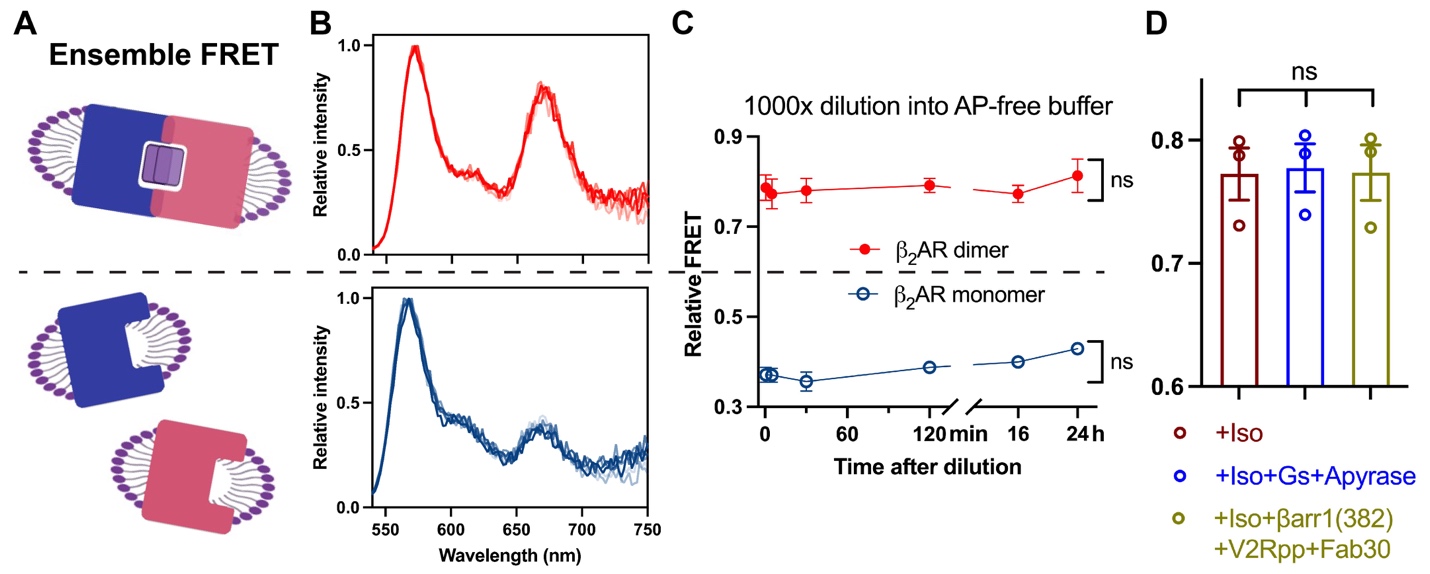


**Supplementary Fig. 5:** **Stability of the AP-bound β2AR dimer in solution.** **A**, Schematic of ensemble FRET assay for receptor dimerization. Red and blue rectangles with an indentation represent receptors labeled with donor or acceptor fluorophores. Purple rectangles represent AP molecules. **B**, Normalized fluorescence spectra of AP-bound β2AR dimer (top) and β2AR monomer (bottom) in AP-free buffer. **C**, Time course of relative FRET for AP-bound β2AR dimer (red) and β2AR monomer (blue) in AP-free buffer. **D**, Relative FRET in the AP-bound β2AR dimer sample is not affected by agonist, Gs, or activated β-arrestin1. Data are presented as mean with SEM, n = 3. ns, not significant.


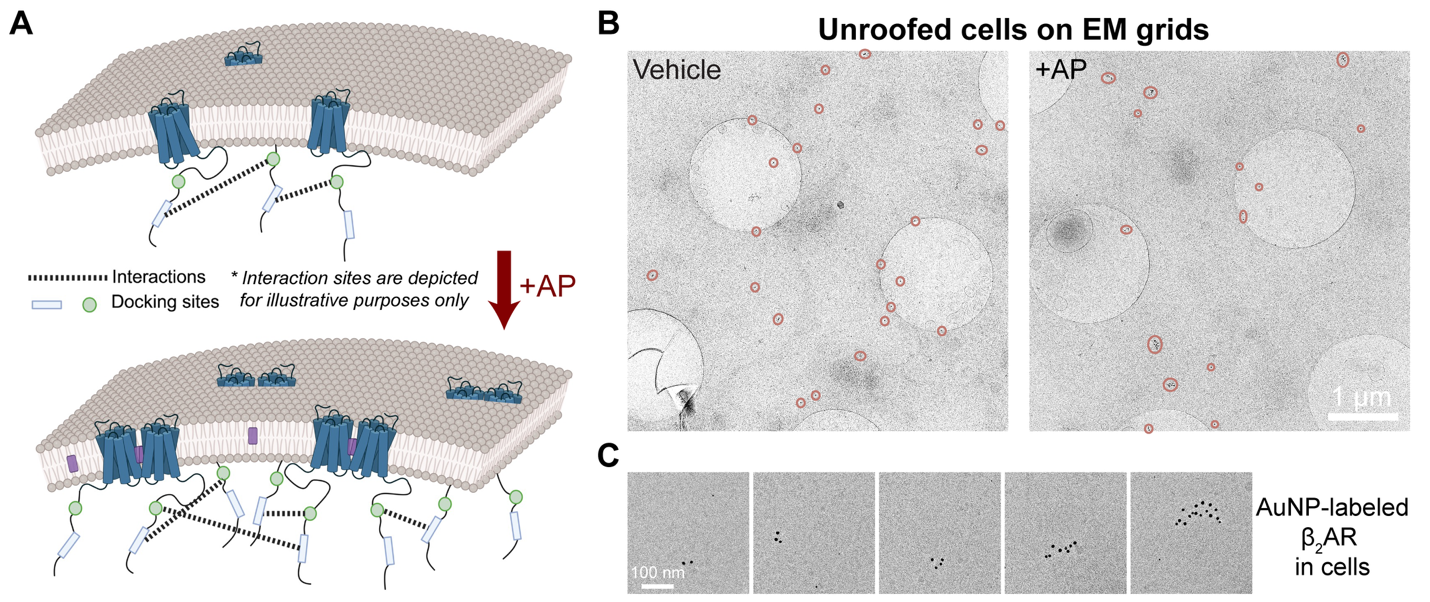


**Supplementary Fig. 6:** **β2AR nanoclustering on cell membranes visualized by immuno-gold labeling cryo-EM.** **A**, Schematic illustrating a potential mechanism by which AP-induced β2AR dimerization leads to enlarged nanoclusters. The locations of transient receptor–receptor interactions are shown for conceptual purposes; molecular details remain undefined. Potential contacts observed in **Supplementary Fig. 8C** may contribute to the formation of HOTS. **B**, Representative cryo-EM images of unroofed cell membranes on grids (Quantifoil R1.2/1.3), showing β2AR labeled with gold nanoparticle (AuNP)–conjugated antibodies. Nanoclusters are highlighted with orange circles. **C**, Gallery of AuNP-labeled β2AR nanoclusters displaying varying numbers of particles.


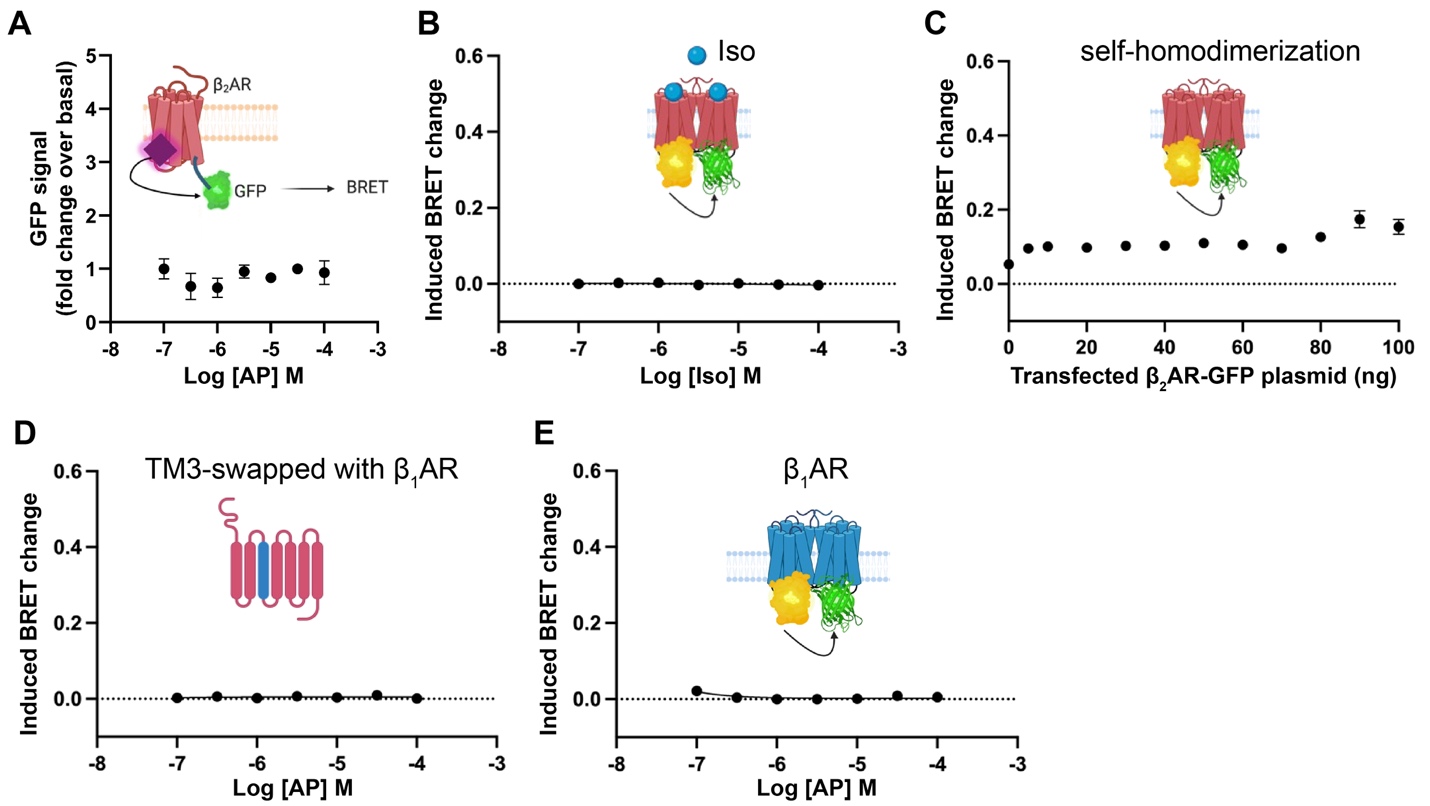


**Supplementary Fig. 7:** **Validation of cell-based BRET assays on receptor dimerization.** **A**, AP does not generate nonspecific BRET signals. **B**, Agonist Iso does not induce β2AR dimerization in the assay. **C**, Saturation BRET assays show no significant change in baseline BRET signal with increasing amounts of transfected β2AR–GFP plasmid. **D**, Swapping TM3 of β2AR with that of β1AR disrupts AP-induced dimerization. **E**, AP does not induce dimerization of β1AR. All data are presented as mean with SEM, n = 3.


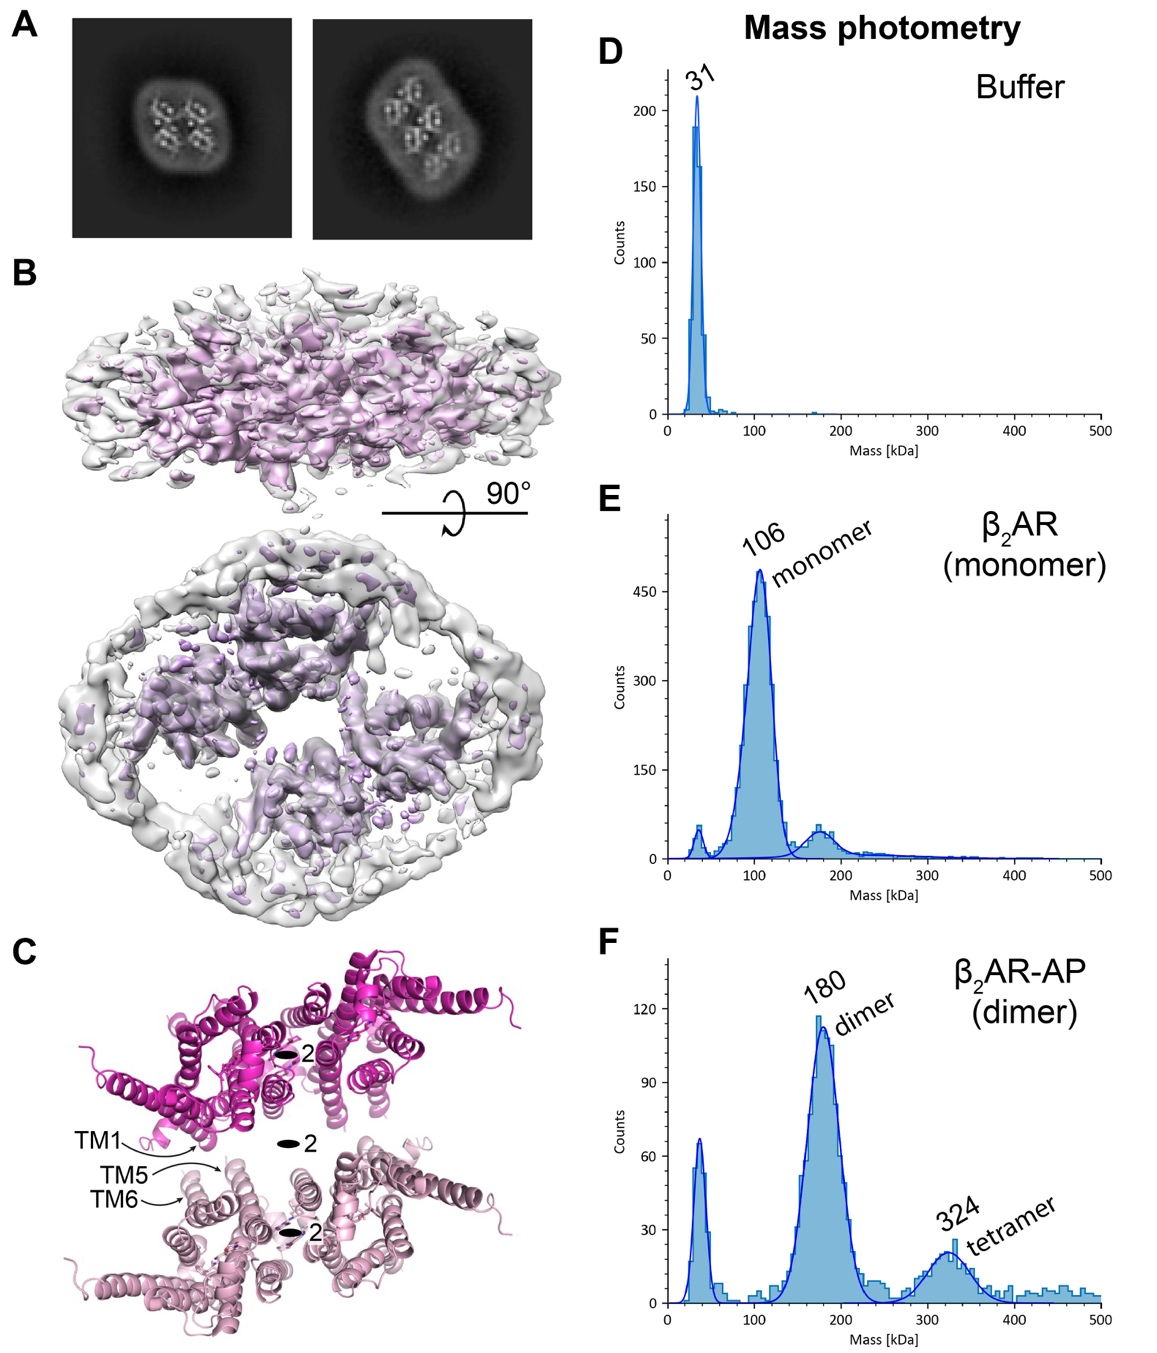


**Supplementary Fig. 8:** **Higher-order oligomers of AP-bound β2AR.** **A**, 2D class averages from the cryo-EM dataset of AP-bound β2AR show top views of dimer-of-dimer and trimer-of-dimer species. **B**, 3D reconstruction of the dimer-of-dimer species. Resolution anisotropy in the map is due to the scarcity of side views. **C**, Structural model of the dimer-of-dimer, with two β2AR dimers docked into the cryo-EM map. TM1–ICL1 and the cytosolic ends of TM5–TM6 form potential inter-dimer contacts. Two-fold symmetry axes are indicated. **D–F**, Particle mass distributions from mass photometry of buffer alone (**D**), monomeric β2AR (**E**), and AP-bound β2AR dimer (**F**) samples. Samples were diluted to 20 nM for measurements. A significant population of particles corresponding to tetrameric β2AR is detected in **F**.


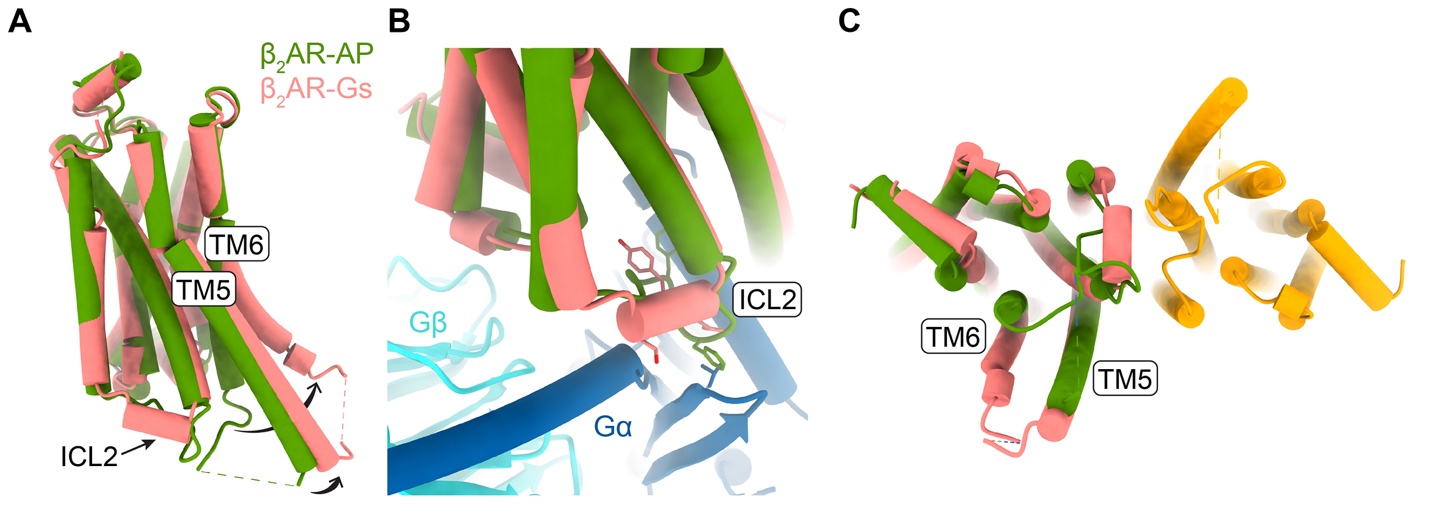


**Supplementary Fig. 9: Conformational changes between AP-bound β₂AR and Gs-bound activated β₂AR.** **A**, Structural comparison of one protomer from the AP-bound dimer (green) and monomeric Gs-bound β2AR (pink, PDB ID: 3SN6). **B**, Conformational changes in ICL2 in the active β2AR. Gs bound to active β2AR is shown in dark blue and cyan. Side chains of key contact residues are shown as sticks. **C**, Intracellular view of active β2AR (pink) superimposed onto one protomer (green) of the AP-bound dimer (green and orange).


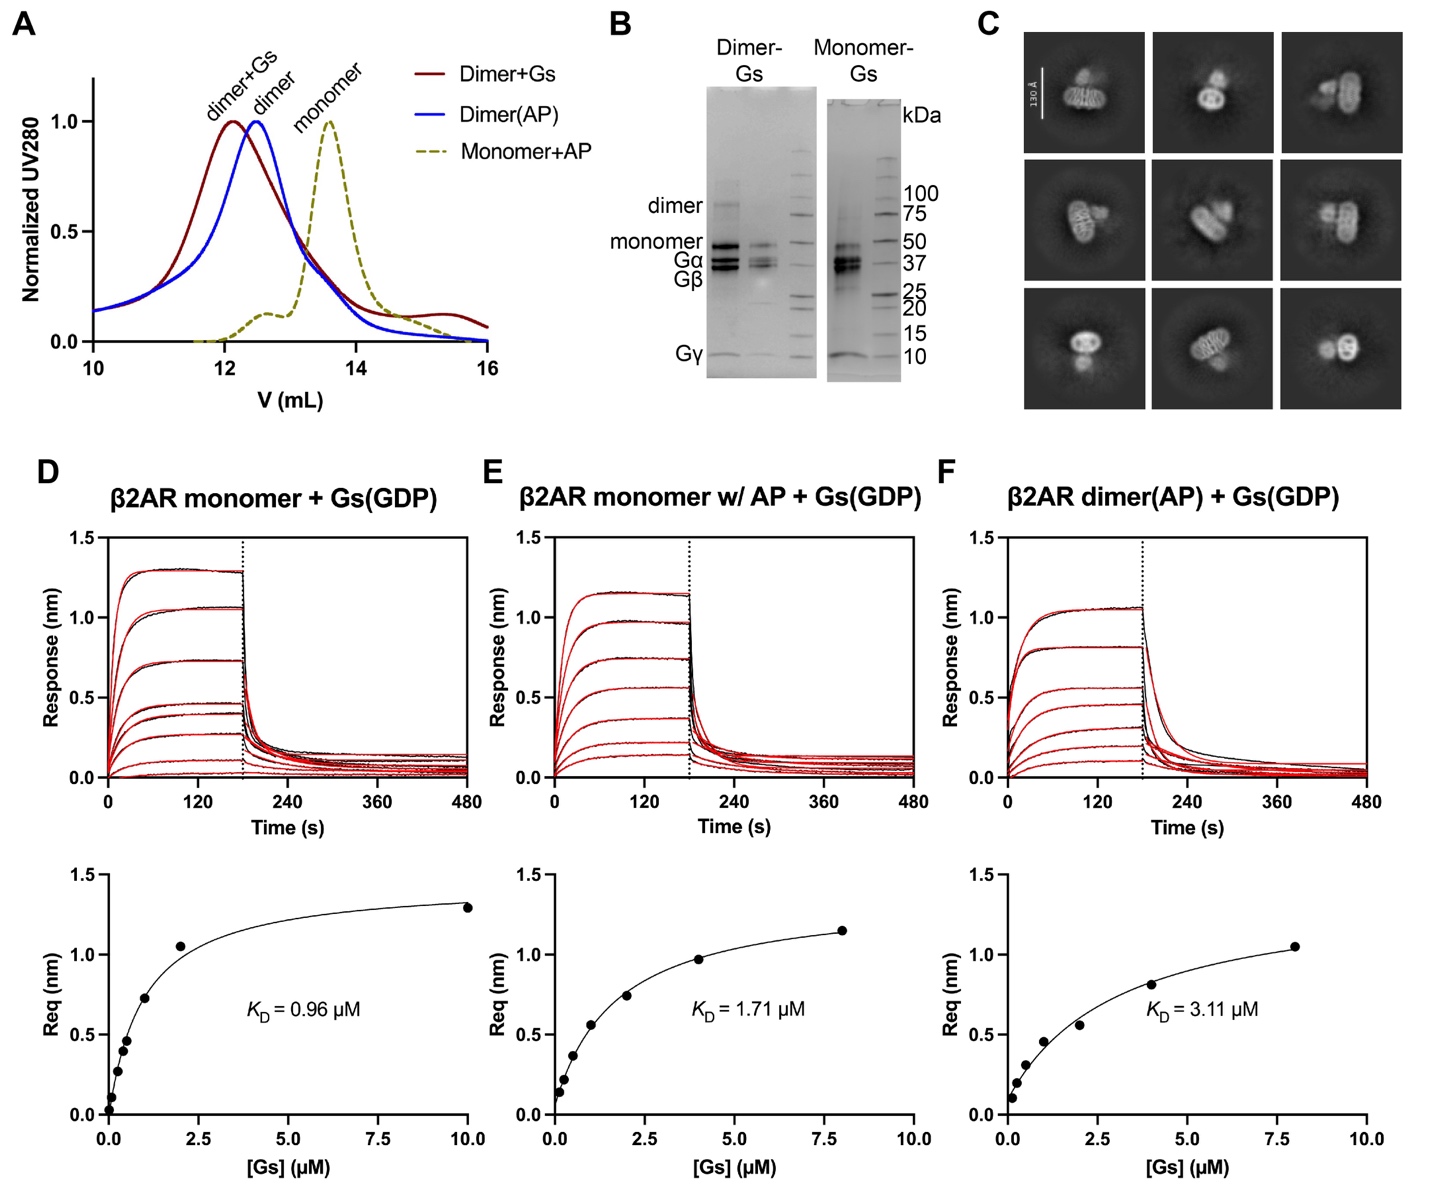


**Supplementary Fig. 10: AP-bound β₂AR dimer can effectively form a complex with Gs.** **A**, SEC profiles showing the formation of a stable dimer–Gs complex after GDP removal by apyrase. **B**, Coomassie-stained SDS-PAGE gel of peak fractions from **A**. **C**, Preliminary cryo-EM 2D class averages of the dimer–Gs complex. Sensorgrams of BLI binding assays of GDP-bound Gs to β2AR monomer (**D**), monomer with 10 µM AP (**E**), and AP-bound β2AR dimer (**F**). Iso is present at 10 µM in all the conditions. Kinetics and equilibrium binding constants are summarized in **Supplementary Table 2**.


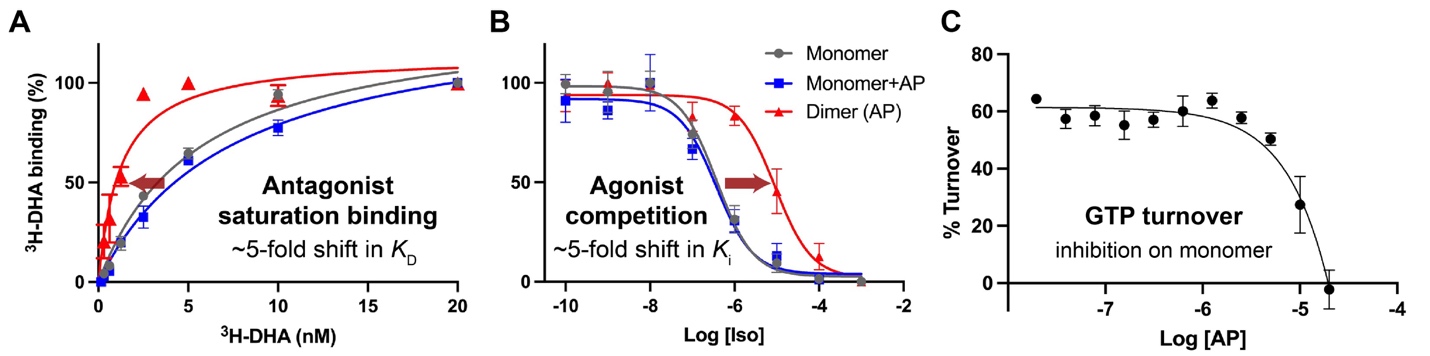


**Supplementary Fig. 11:** **Radioligand binding and GTP turnover assays of β2AR in the presence of AP.** **A**, Saturation binding of β2AR to the radiolabeled antagonist [3H]-DHA. Shifts in binding affinity (*K*D) between monomeric β2AR with AP and AP-bound dimer are indicated. **B**, Competition binding of [3H]-DHA with agonist Iso in monomeric β2AR (gray), monomer with 10 µM AP (blue), and AP-bound dimer (red). Shifts in the inhibition constant (*K*i) of Iso are indicated. **C**, GTP turnover by Gs, catalyzed by monomeric β2AR, is inhibited by AP at high concentrations. All assays were performed with β₂AR reconstituted in nanodiscs. Data are shown as mean with SEM. In **A** and **B**, n = 3; in (**C**), n = 5.


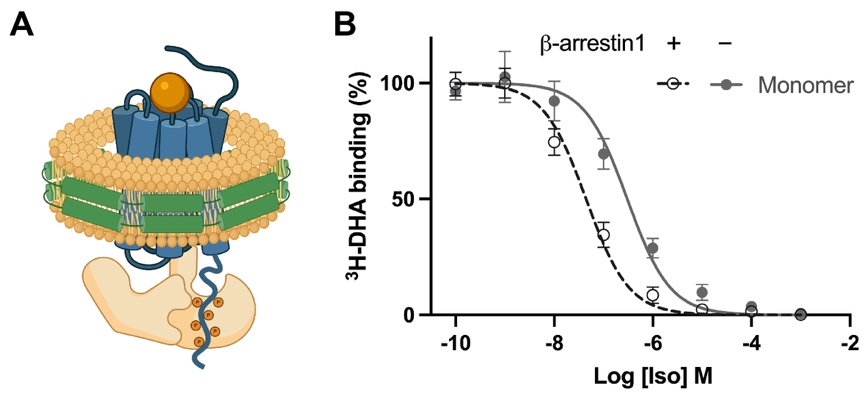


**Supplementary Fig. 12:** **Allosteric effect of β-arrestin1 on radioligand binding of β₂AR.** **A**, Schematic of β2AR ligated to V2Rpp in nanodisc illustrating core engagement with β-arrestin. **B**, Competition binding of [3H]-DHA with agonist Iso in monomeric β2AR in the presence (black) or absence (gray) of β-arrestin1.


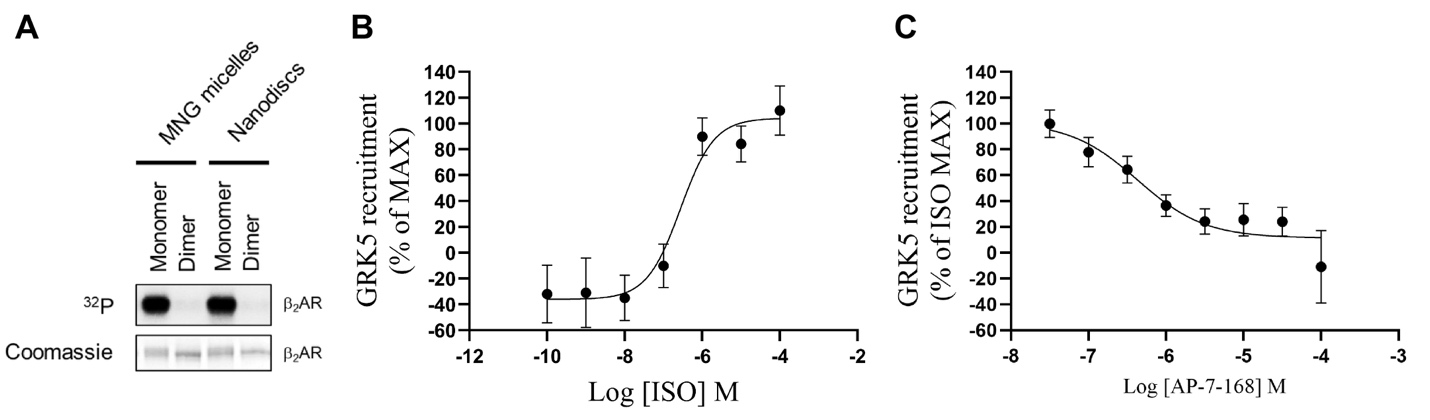


**Supplementary Fig. 13:** **β2AR phosphorylation and GRK5 recruitment in cells.** **A**, Radiometric kinase assay of β2AR in detergent or nanodisc. Left: Coomassie staining and 32P autoradiography of β2AR. Quantification of phosphorylation levels is shown in Fig. 5H. **B**, Dose-dependent curve of ISO-stimulated GRK5 recruitment in cells. **C**, Dose-dependent inhibition of GRK5 recruitment by AP. 1 µM ISO was used to stimulate GRK5 recruitment. All data are presented as mean with SEM, n = 3.


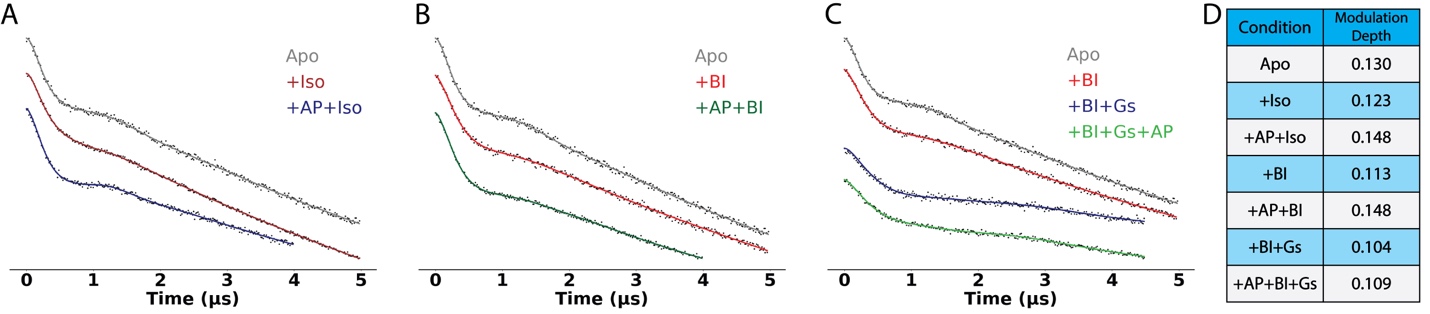


**Supplementary Fig. 14: DEER dipolar evolution traces of spin-labeled β2AR in detergent micelles.** DEER measurements were performed on β2AR with spin labels attached to TM4 and TM6. **A–C**, Background-corrected dipolar evolution traces under different ligand conditions. Black dots represent experimental data; colored lines represent fitted curves which are used to derive the distance distributions shown in **Fig. 5F–H**. **D**, The modulation depths for each experimental condition.

**Supplementary Table 1: Cryo-EM data collection, refinement, and validation statistics**

| **Protein** | **Human β2AR_dimer(AP) in MSPE3D1 nanodisc** | **Human β2AR_dimer(AP) in detergent** |
| --- | --- | --- |
| **Cryo-EM Data Collection** |  |  |
| Voltage (kV) | 300 | 300 |
| Magnification (x) | 130,000 | 130,000 |
| Pixel Size (Å) | 0.83 | 0.95 |
| Electron exposure (e-/Å2/frame) | 1.25 | 1.25 |
| Defocus range (µm) | [−2.0, −0.8] | [−2.0, −0.8] |
| Number of image stacks | 17,997 | 7,139 |
| Number of frames per stack | 40 | 40 |
| **Cryo-EM Data Processing** |  |  |
| Initial number of particles | 2,371,430 | 1,961,893 |
| Final number of particles | 237,408 | 48,805 |
| Symmetry imposed | C2 | C2 |
| Map sharpening B factor (Å2) | 100 | 125 |
| Map resolution (Å) | 2.5 | 2.9 |
| Map resolution range (Å) | 2.1 – 2.8 | 2.4 – 3.5 |
| FSC threshold | 0.143 | 0.143 |
| **Model Refinement** |  |  |
| Number of amino acids | 287 |  |
| Total non-hydrogen atoms | 2479 |  |
| Model-to-map resolution (Å) | 2.6 |  |
| Average B factor (Å2) | 18.10 |  |
| Bond length RMSD (Å) | 0.003 |  |
| Bond angle RMSD (°) | 0.513 |  |
| Ramachandran Plot |  |  |
| Favored (%) | 100 |  |
| Allowed (%) | 0 |  |
| Outliers (%) | 0 |  |
| Rotamer outliers (%) | 0.39 |  |
| MolProbity Score | 0.98 |  |

**Supplementary Table 2: Kinetic and binding constants for Gs(GDP) interactions with β₂AR measured by BLI**

| Sample | monomer | monomer + AP | dimer (AP) |
| --- | --- | --- | --- |
| *K*D (µM) | 0.96 ± 0.30 | 1.71 ± 0.48 | 3.11 ± 0.89 |
| *k*on (×104 M-1 s-1) | 7.53 ± 1.53 | 5.37 ± 2.80 | 2.82 ± 2.22 |
| *k*off (×10-2 s-1) | 2.42 ± 0.22 | 2.30 ± 0.68 | 1.57 ± 0.10 |
